# Supplementary material for: Functional insights into nucleoside diphosphate kinases encoded by two ndk paralogs in Waddlia chondrophila
Source: Research Square preprint supplement (doi:10.21203/rs.3.rs-8206315/v1), 2025-12-19
Supplement: Supplementary file 1 [file b5d017e99fbbe708f84aaa8f.pdf]

SUPPLEMENTARY MATERIAL

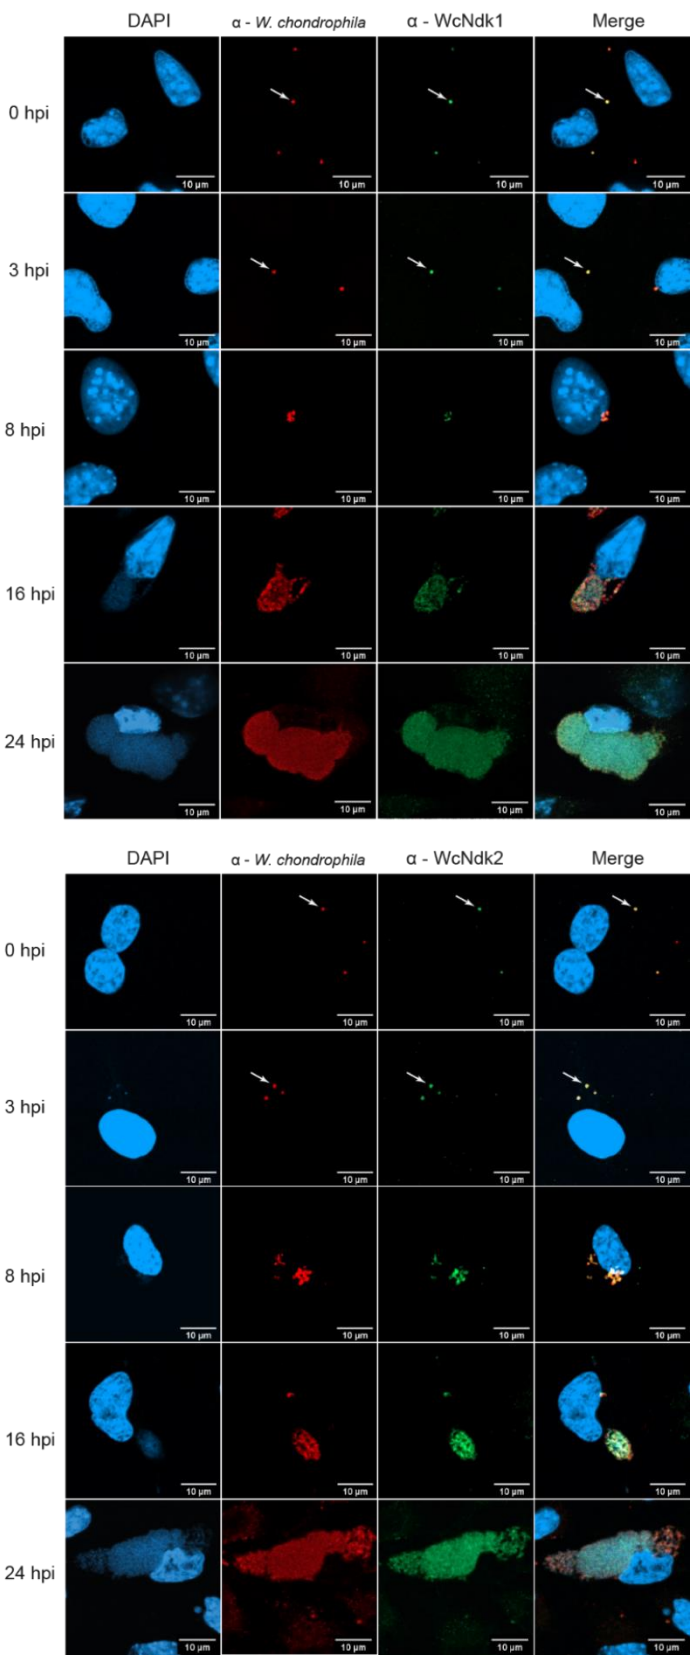

Figure S1: Immunofluorescence detection of WcNdk1 and WcNdk2 during *W. chondrophila* infection. DAPI staining (blue) marks host nuclei, anti-*W. chondrophila* (red) labels bacteria, and anti-WcNdk1 or anti-WcNdk2 (green) detect the corresponding proteins. Merged images show colocalization in yellow. Arrows indicate the localization of bacteria, WcNdks, and their colocalization.

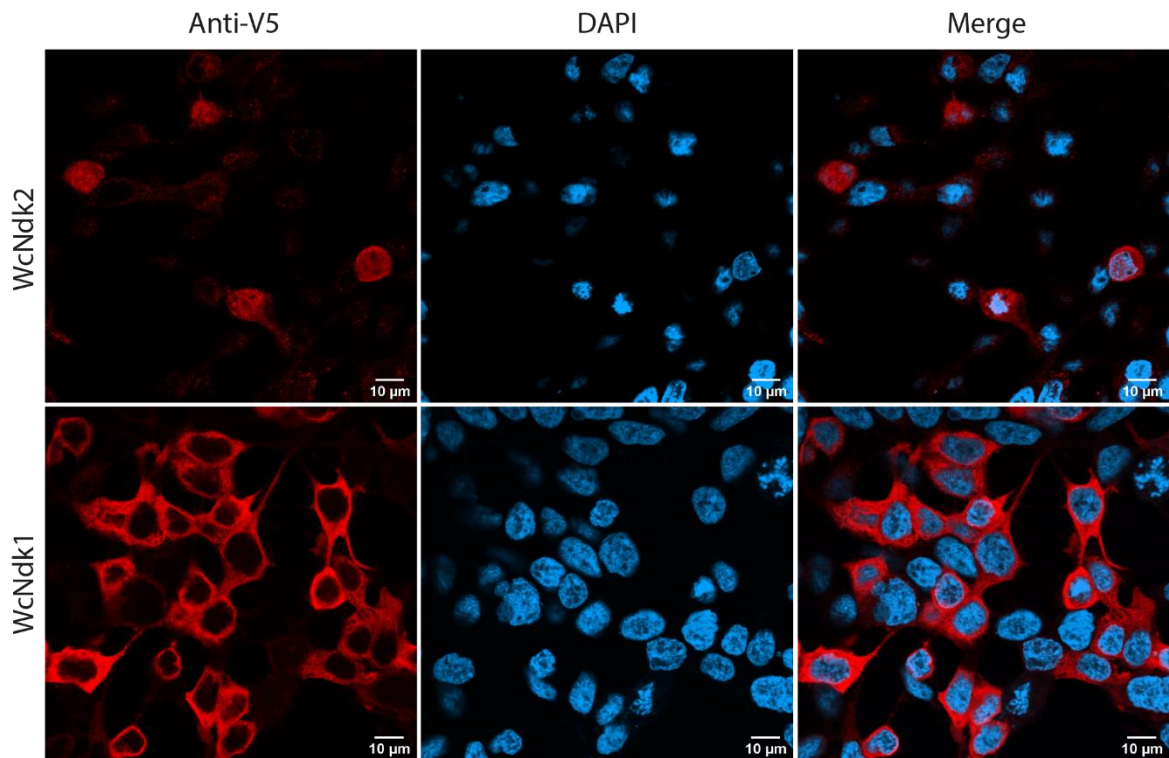

Figure S2: HeLa cells expressing WcNdk1-V5 or WcNdk2-V5. Cells were transiently transfected with WcNdk1 and WcNdk2 constructs carrying a C-terminal V5 tag.

| Target gene                | Oligo type     | Sequence (5' -> 3')                 | Label     | Amplicon size (bp) |
|----------------------------|----------------|-------------------------------------|-----------|--------------------|
| wcw_1543 ( <i>wcndk1</i> ) | Forward primer | tgg-tat-tgg-aag-gag-acg-atg-c       | -         | 160                |
| wcw_1543 ( <i>wcndk1</i> ) | Reverse primer | tcc-gtt-ttt-gcc-gtt-tct-gg          | -         | 160                |
| wcw_1545 ( <i>wcndk2</i> ) | Forward primer | agt-tgt-tgc-gat-ggt-act-gga         | -         | 150                |
| wcw_1545 ( <i>wcndk2</i> ) | Reverse primer | gaa-tct-gat-cca-tgc-acg-gc          | -         | 150                |
| <i>Waddlia</i> 16S rRNA    | Forward primer | ggc-cct-tgg-gtc-gta-aag-ttc-t       | -         | 101                |
| <i>Waddlia</i> 16S rRNA    | Reverse primer | cgg-agt-tag-ccg-gtg-ctt-ct          | -         | 101                |
| <i>Waddlia</i> 16S rRNA    | TaqMan prob    | FAM-cAt-ggg-aaC-aag-aga-agG-ATg-BHQ | FAM/BHQ-1 | -                  |

Table S1: Primer sequences used for RT-qPCR in this study. Sequence letters in capital are Locked Nucleic acids.

|                            | C. sequanensis_Ndk2 | E. lausannensis_Ndk2 | W. chondrophila_Ndk2 | Neochlamydia_a sp_Ndk2 | P. cantlamoebae_Ndk2 | Neochlamydia_sp_Ndk1 | C. sequanensis_Ndk1 | E. lausannensis_Ndk1 | P. acanthamoebae_Ndk1 | W. chondrophila_Ndk1 | Rabdochlamydia_Ndk | S. negevensis_Ndk | C. trachomatis_Ndk | Paeruginosa_Ndk | Thioalbus_dentrifivans_Ndk | Legionella_pneumophila_Ndk | Halofilum_ochreaceum_Ndk | M. tuberculosis_Ndk | E. coli_Ndk | A.flau_Ndk | A.niger_Ndk |
|----------------------------|---------------------|----------------------|----------------------|------------------------|----------------------|----------------------|---------------------|----------------------|-----------------------|----------------------|--------------------|-------------------|--------------------|-----------------|----------------------------|----------------------------|--------------------------|---------------------|-------------|------------|-------------|
| C. sequanensis_Ndk2        | 100%                |                      |                      |                        |                      |                      |                     |                      |                       |                      |                    |                   |                    |                 |                            |                            |                          |                     |             |            |             |
| E. lausannensis_Ndk2       | 62%                 | 100%                 |                      |                        |                      |                      |                     |                      |                       |                      |                    |                   |                    |                 |                            |                            |                          |                     |             |            |             |
| W. chondrophila_Ndk2       | 49%                 | 56%                  | 100%                 |                        |                      |                      |                     |                      |                       |                      |                    |                   |                    |                 |                            |                            |                          |                     |             |            |             |
| Neochlamydia_sp_Ndk2       | 48%                 | 52%                  | 57%                  | 100%                   |                      |                      |                     |                      |                       |                      |                    |                   |                    |                 |                            |                            |                          |                     |             |            |             |
| P. cantlamoebae_Ndk2       | 55%                 | 60%                  | 62%                  | 64%                    | 100%                 |                      |                     |                      |                       |                      |                    |                   |                    |                 |                            |                            |                          |                     |             |            |             |
| Neochlamydia_sp_Ndk1       | 51%                 | 56%                  | 55%                  | 57%                    | 57%                  | 100%                 |                     |                      |                       |                      |                    |                   |                    |                 |                            |                            |                          |                     |             |            |             |
| C. sequanensis_Ndk1        | 50%                 | 56%                  | 62%                  | 56%                    | 60%                  | 77%                  | 100%                |                      |                       |                      |                    |                   |                    |                 |                            |                            |                          |                     |             |            |             |
| E. lausannensis_Ndk1       | 48%                 | 57%                  | 60%                  | 56%                    | 57%                  | 82%                  | 81%                 | 100%                 |                       |                      |                    |                   |                    |                 |                            |                            |                          |                     |             |            |             |
| P. acanthamoebae_Ndk1      | 51%                 | 57%                  | 56%                  | 56%                    | 56%                  | 81%                  | 78%                 | 83%                  | 100%                  |                      |                    |                   |                    |                 |                            |                            |                          |                     |             |            |             |
| W. chondrophila_Ndk1       | 49%                 | 52%                  | 54%                  | 59%                    | 53%                  | 76%                  | 73%                 | 79%                  | 79%                   | 100%                 |                    |                   |                    |                 |                            |                            |                          |                     |             |            |             |
| Rabdochlamydia_Ndk         | 46%                 | 50%                  | 57%                  | 53%                    | 52%                  | 65%                  | 64%                 | 66%                  | 66%                   | 66%                  | 100%               |                   |                    |                 |                            |                            |                          |                     |             |            |             |
| S. negevensis_Ndk          | 51%                 | 55%                  | 57%                  | 54%                    | 57%                  | 77%                  | 73%                 | 77%                  | 78%                   | 76%                  | 69%                | 100%              |                    |                 |                            |                            |                          |                     |             |            |             |
| C. trachomatis_Ndk         | 47%                 | 53%                  | 59%                  | 53%                    | 55%                  | 71%                  | 70%                 | 72%                  | 70%                   | 66%                  | 67%                | 69%               | 100%               |                 |                            |                            |                          |                     |             |            |             |
| Paeruginosa_Ndk            | 48%                 | 52%                  | 56%                  | 54%                    | 54%                  | 72%                  | 70%                 | 78%                  | 76%                   | 80%                  | 68%                | 77%               | 66%                | 100%            |                            |                            |                          |                     |             |            |             |
| Thioalbus_dentrifivans_Ndk | 48%                 | 52%                  | 55%                  | 56%                    | 55%                  | 75%                  | 73%                 | 80%                  | 79%                   | 82%                  | 70%                | 81%               | 72%                | 88%             | 100%                       |                            |                          |                     |             |            |             |
| Legionella_pneumophila_Ndk | 52%                 | 54%                  | 59%                  | 55%                    | 58%                  | 75%                  | 72%                 | 76%                  | 74%                   | 72%                  | 69%                | 79%               | 72%                | 77%             | 80%                        | 100%                       |                          |                     |             |            |             |
| Halofilum_ochreaceum_Ndk   | 46%                 | 51%                  | 55%                  | 54%                    | 53%                  | 71%                  | 70%                 | 77%                  | 76%                   | 79%                  | 67%                | 77%               | 66%                | 99%             | 88%                        | 77%                        | 100%                     |                     |             |            |             |
| M. tuberculosis_Ndk        | 38%                 | 45%                  | 48%                  | 45%                    | 47%                  | 57%                  | 55%                 | 58%                  | 57%                   | 57%                  | 56%                | 59%               | 54%                | 88%             | 80%                        | 58%                        | 57%                      | 100%                |             |            |             |
| E. coli_Ndk                | 43%                 | 48%                  | 49%                  | 48%                    | 49%                  | 66%                  | 66%                 | 72%                  | 68%                   | 67%                  | 65%                | 68%               | 63%                | 70%             | 71%                        | 68%                        | 69%                      | 56%                 | 100%        |            |             |
| A.flau_Ndk                 | 36%                 | 37%                  | 44%                  | 40%                    | 41%                  | 53%                  | 52%                 | 54%                  | 53%                   | 53%                  | 51%                | 51%               | 49%                | 49%             | 51%                        | 49%                        | 51%                      | 54%                 | 89%         | 100%       |             |
| A.niger_Ndk                | 36%                 | 37%                  | 43%                  | 39%                    | 41%                  | 51%                  | 51%                 | 52%                  | 52%                   | 53%                  | 49%                | 52%               | 51%                | 49%             | 51%                        | 52%                        | 49%                      | 54%                 | 51%         | 89%        | 100%        |
| Homo sapiens_Ndk           | 34%                 | 36%                  | 44%                  | 39%                    | 39%                  | 51%                  | 49%                 | 55%                  | 53%                   | 53%                  | 50%                | 51%               | 51%                | 51%             | 51%                        | 52%                        | 51%                      | 52%                 | 73%         | 73%        | 73%         |

Table S2: Sequence similarity matrix of Ndk proteins across selected species. Heatmap showing pairwise amino acid identity (%) between Ndk proteins from diverse organisms. A: *Aspergillus*, C. *trachomatis*: *Chlamydia trachomatis*, C. *sequanensis*: *Criblamydia sequanensis*, E. coli: *Escherichia coli*, E. *lausannensis*: *Estrella lausannensis*, M: *Mycobacterium*, P. *acanthamoebae*: *Parachlamydia acanthamoebae*, P. *aeruginosa*: *Pseudomonas aeruginosa*, S: *Simkania*, W: *Waddlia*.

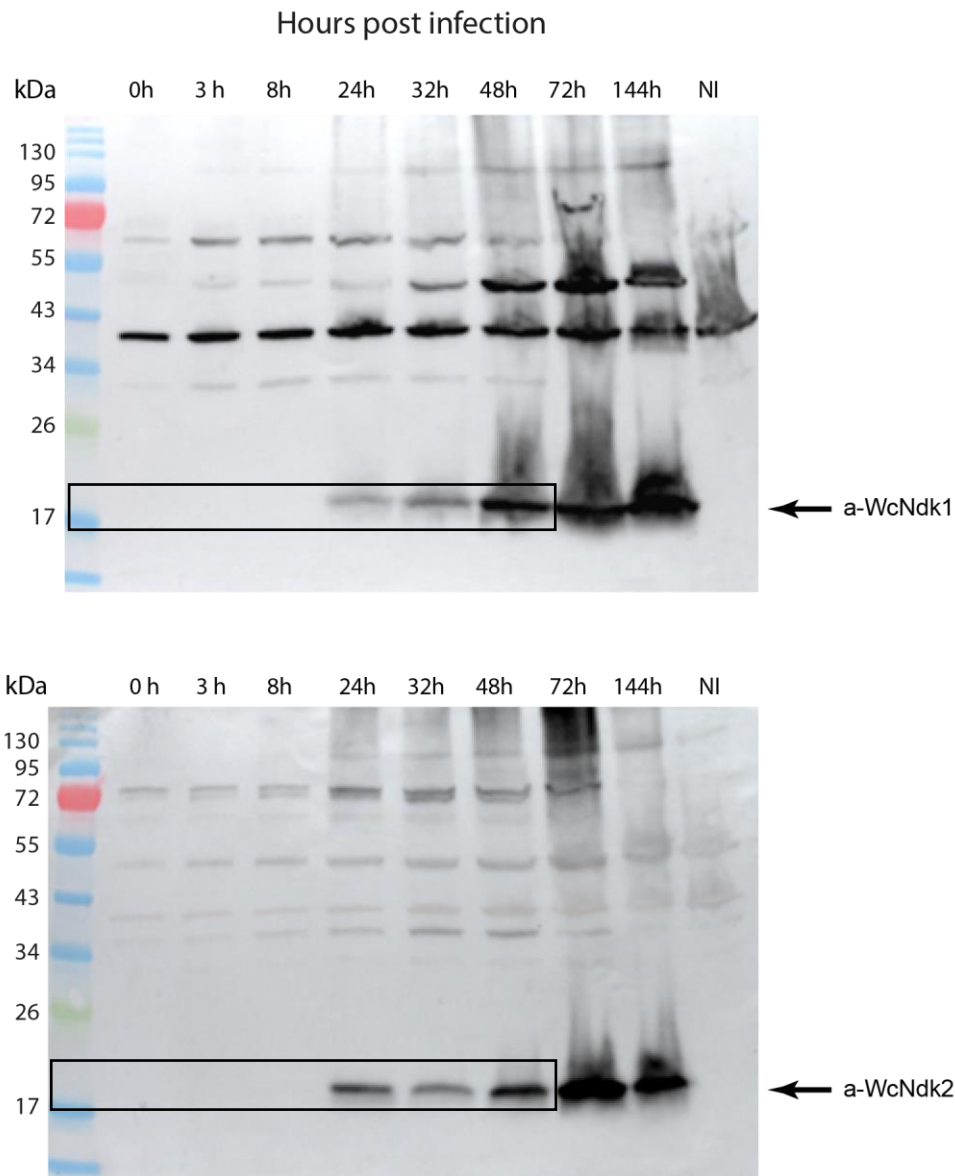

Figure S3: Full, uncropped immunoblot corresponding to Figure 3C. Arrows indicate the WcNdk1 and WcNdk2 proteins. Bands inside the black boxes were used for density quantification. Bands with similar molecular weight is not present in non-infected (NI) lysates, consistent with the antibody not detecting the host NDPKs at this molecular weight. Time points 72 hpi and 144 hpi are shown here for completeness but were not included in the main figure and not used for quantification because they fall outside the developmental period analyzed in this study.
